# Supplementary material for: Neuroendocrine immunomodulation network dysfunction in SAMP8 mice and PrP-hAβPPswe/PS1ΔE9 mice: potential mechanism underlying cognitive impairment
Source: PubMed Central journal article supplement (PMC5029605; doi:10.18632/oncotarget.8453), 2016-03-28
Supplement: oncotarget-07-22988-s005.pdf [file oncotarget-07-22988-s005.pdf]

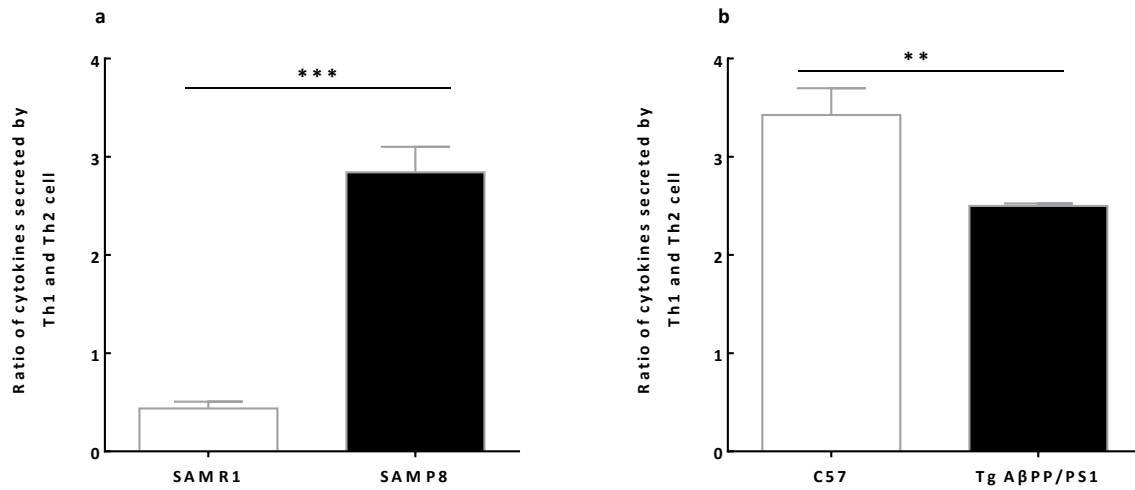

**Supplemental material 5 The imbalance between Th1 and Th2 cell contributing to cognitive impairment in SAMP8 mice and PrP-hAβPPswe/PS1<sup>ΔE9</sup> mice.**

(a) The imbalance between Th1 and Th2 cell in SAMP8 mice. (b) The imbalance between Th1 and Th2 cell in PrP-hAβPPswe/PS1<sup>ΔE9</sup> mice. Multiple linear regression analysis showed that IL-2, TNF-β secreted by Th1 cell, IL-5 secreted by Th2 cell, GM-CSF secreted by both Th1 and Th2 cell contributed to the cognitive impairment of SAMP8 mice. And IFN-γ, TNF-β secreted by Th1 cell, GM-CSF secreted by both Th1 and Th2 cell contributed to the cognitive impairment of PrP-hAβPPswe/PS1<sup>ΔE9</sup> mice. The data normalization method for concentration of these cytokines was  $\frac{x-Min}{Max+Min}$ ,  $x$  was the concentration of cytokine,  $Min$  was minimum concentration in the group,  $Max$  was maximum concentration in the group. The ratio of cytokines secreted by Th1 cell and Th2 cell of SAMR1 and SAMP8 mice was calculated by  $\frac{C_{IL-2}+C_{GM-CSF}+C_{TNF-\beta}}{C_{IL-5}+C_{GM-CSF}}$ , and that of C57 and PrP-hAβPPswe/PS1<sup>ΔE9</sup> mice was

calculated by  $\frac{C_{IFN-\gamma}+C_{GM-CSF}+C_{TNF-\beta}}{C_{GM-CSF}}$ ,  $C$  was abbreviation for concentration. \*\* $P < 0.01$ , \*\*\* $P < 0.001$ , compared with control mice. Data represent mean  $\pm$  SEM,  $n=10\sim 15$ , unpaired Student T-test.
