# Supplementary material for: Neuroendocrine immunomodulation network dysfunction in SAMP8 mice and PrP-hAβPPswe/PS1ΔE9 mice: potential mechanism underlying cognitive impairment
Source: PubMed Central journal article supplement (PMC5029605; doi:10.18632/oncotarget.8453), 2016-03-28
Supplement: oncotarget-07-22988-s006.pdf [file oncotarget-07-22988-s006.pdf]

**Supplemental material 6 The deficiency of NIM network in PrP-hA $\beta$ PPswe/PS1<sup>AE9</sup> mice**

| Indicator                                        | Model                                   | Age(month)                                         | Gender          | Site                   | Feature         | Reference       |      |
|--------------------------------------------------|-----------------------------------------|----------------------------------------------------|-----------------|------------------------|-----------------|-----------------|------|
| <i>Hypothalamic-pituitary-adrenal (HPA) axis</i> |                                         |                                                    |                 |                        |                 |                 |      |
| CRH                                              | Tg2576                                  | 12                                                 | Male            | Hypothalamus           | Increase        | [1]             |      |
|                                                  |                                         | 18                                                 | Male            | Hypothalamus           | Not significant | [1]             |      |
| CORT                                             | PrP-hA $\beta$ PPswe/PS1 <sup>AE9</sup> | 24                                                 | Male            | Hypothalamus           | Decrease        | [1]             |      |
|                                                  |                                         | 8                                                  | Male            | Plasma                 | Increase        | [2]             |      |
|                                                  |                                         | Tg2576                                             | 6.75            | Male and Female        | Plasma          | Increase        | [3]  |
|                                                  |                                         | PS1 <sub>M146V</sub> /APPswe/ tau <sub>P301L</sub> | 4               | Female                 | Serum           | Increase        | [4]  |
|                                                  |                                         |                                                    | 7               | Male                   | Plasma          | Not significant | [5]  |
|                                                  |                                         |                                                    | 14              | Male                   | Plasma          | Not significant | [5]  |
|                                                  |                                         |                                                    | 20              | Male                   | Plasma          | Not significant | [5]  |
|                                                  |                                         |                                                    | 15              | Male                   | Plasma          | Increase        | [6]  |
|                                                  |                                         |                                                    | 9               | Male                   | Plasma          | Increase        | [7]  |
|                                                  |                                         | 12                                                 | Male            | Plasma                 | Increase        | [7]             |      |
| 15                                               | Male                                    | Plasma                                             | Increase        | [7]                    |                 |                 |      |
| 18                                               | Male                                    | Plasma                                             | Increase        | [7]                    |                 |                 |      |
| <i>Hypothalamus-pituitary-gonadal (HPG) axis</i> |                                         |                                                    |                 |                        |                 |                 |      |
| T                                                | TASTPM                                  | 12.5                                               | Male            | Plasma                 | Decrease        | [8]             |      |
| <i>Proinflammatory factor</i>                    |                                         |                                                    |                 |                        |                 |                 |      |
| <i>Interleukin</i>                               |                                         |                                                    |                 |                        |                 |                 |      |
| IL-1 $\beta$                                     | PrP-hA $\beta$ PPswe/PS1 <sup>AE9</sup> | 9                                                  | Female          | Serum                  | Increase        | [9]             |      |
|                                                  |                                         | 7                                                  | -               | Hippocampal and Cortex | Increase        | [10]            |      |
|                                                  |                                         | 9                                                  | Male            | Brain                  | Increase        | [11]            |      |
|                                                  |                                         | 9                                                  | Male            | Brain                  | Increase        | [12]            |      |
|                                                  |                                         | 12                                                 | Female          | Cortex                 | Increase        | [13]            |      |
|                                                  |                                         | 9.5                                                | Male            | Cortex                 | Increase        | [14]            |      |
|                                                  |                                         | 8~9                                                | Female and Male | Hippocampal and Cortex | Increase        | [15]            |      |
|                                                  |                                         | 7                                                  | -               | Cortex                 | Increase        | [16]            |      |
|                                                  |                                         | APP V717I                                          | 10              | -                      | Cortex          | Increase        | [17] |
|                                                  |                                         | APP <sub>751SL</sub> /PS1 <sub>M146L</sub>         | 6               | Male                   | Microglial cell | Increase        | [18] |
|                                                  |                                         |                                                    | 18              | Male                   | Microglial cell | Increase        | [18] |

| Indicator                    | Model                                                     | Age(month)                                       | Gender         | Site                   | Feature         | Reference |
|------------------------------|-----------------------------------------------------------|--------------------------------------------------|----------------|------------------------|-----------------|-----------|
| IL-2                         | APP <sub>K670N/M671L</sub> /PS1 <sub>M146V</sub>          | 14.5                                             | -              | Plasma                 | Increase        | [19]      |
|                              | APP <sub>K670N/M671L</sub> /PS1 <sub>M146V</sub>          | 14.5                                             | -              | Plasma                 | Not significant | [19]      |
| IL-6                         | APP <sub>K670N/M671L</sub> /PS1 <sub>M146L</sub>          | 11                                               | -              | Plasma                 | Increase        | [20]      |
|                              | PrP-hA $\beta$ PPswe/PS1 <sup><math>\Delta</math>E9</sup> | 9                                                | Male           | Brain                  | Increase        | [12]      |
|                              |                                                           | 15-24                                            | Male or female | Serum                  | Increase        | [21]      |
|                              |                                                           | 9                                                | Female         | Serum                  | Increase        | [22]      |
|                              |                                                           | 6                                                | Female         | Serum                  | Not significant | [23]      |
|                              |                                                           | 9                                                | Female         | Serum                  | Increase        | [23]      |
|                              |                                                           | 12                                               | Female         | Serum                  | Increase        | [23]      |
|                              |                                                           | 9                                                | -              | Hippocampus            | Increase        | [24]      |
|                              |                                                           | 14                                               | -              | Hippocampus            | Increase        | [24]      |
|                              |                                                           | APP <sub>K670N/M671L</sub> /PS1 <sub>M146V</sub> | 14.5           | -                      | Plasma          | Increase  |
| IL-17                        | APP <sub>swe</sub> /PS1-A246E                             | 12                                               | Male           | Brain                  | Increase        | [25]      |
|                              | APP <sub>K670N/M671L</sub> /PS1 <sub>M146V</sub>          | 14.5                                             | -              | Plasma                 | Not significant | [19]      |
|                              | <i>Colony stimulating factor</i>                          |                                                  |                |                        |                 |           |
| GM-CSF                       | PrP-hA $\beta$ PPswe/PS1 <sup><math>\Delta</math>E9</sup> | 9                                                | Female         | Serum                  | Increase        | [9]       |
|                              | APP <sub>K670N/M671L</sub> /PS1 <sub>M146V</sub>          | 14.5                                             | -              | Plasma                 | Not significant | [19]      |
|                              |                                                           | 11                                               | -              | Plasma                 | Increase        | [20]      |
| <i>Interferon</i>            |                                                           |                                                  |                |                        |                 |           |
| IFN- $\gamma$                | PrP-hA $\beta$ PPswe/PS1 <sup><math>\Delta</math>E9</sup> | 15-24                                            | Male or female | Serum                  | Increase        | [21]      |
|                              | APP <sub>K670N/M671L</sub> /PS1 <sub>M146V</sub>          | 14.5                                             | -              | Plasma                 | Not significant | [19]      |
|                              | APP <sub>K670N/M671L</sub> /PS1 <sub>M146L</sub>          | 11                                               | -              | Plasma                 | Increase        | [20]      |
| <i>Tumor necrosis factor</i> |                                                           |                                                  |                |                        |                 |           |
| TNF- $\alpha$                | PrP-hA $\beta$ PPswe/PS1 <sup><math>\Delta</math>E9</sup> | 7                                                | -              | Hippocampal and Cortex | Increase        | [10]      |
|                              |                                                           | 9                                                | Male           | Brain                  | Increase        | [11]      |
|                              |                                                           | 10                                               | Male           | Brain                  | Increase        | [12]      |
|                              |                                                           | 9.5                                              | Male           | Cortex                 | Increase        | [14]      |
|                              |                                                           | 9                                                | Female         | Serum                  | Increase        | [22]      |
|                              |                                                           | 6                                                | Female         | Serum                  | Not significant | [23]      |
|                              |                                                           | 9                                                | Female         | Serum                  | Increase        | [23]      |
|                              |                                                           | 12                                               | Female         | Serum                  | Increase        | [23]      |
|                              |                                                           | 9                                                | -              | Hippocampus            | Not significant | [24]      |

| Indicator                      | Model                                                          | Age(month) | Gender         | Site            | Feature         | Reference |
|--------------------------------|----------------------------------------------------------------|------------|----------------|-----------------|-----------------|-----------|
|                                |                                                                | 14         | -              | Hippocampus     | Increase        | [24]      |
|                                |                                                                | 7          | -              | Cortex          | Increase        | [16]      |
|                                | PS1 <sub>M146V</sub> /APP <sub>swe</sub> /tau <sub>P301L</sub> | 6          | Male           | Hippocampus     | Increase        | [26]      |
|                                | APP <sub>K670N/M671L</sub> /PS1 <sub>M146V</sub>               | 14.5       | -              | Plasma          | Not significant | [19]      |
|                                | APP <sub>K670N/M671L</sub> /PS1 <sub>M146L</sub>               | 11         | -              | Plasma          | Increase        | [20]      |
|                                | APP <sub>swe</sub> /PS1-A246E                                  | 12         | Male           | Brain           | Increase        | [25]      |
|                                | APP <sub>751SL</sub> /PS1 <sub>M146L</sub>                     | 18         | Male           | Microglial cell | Increase        | [18]      |
|                                | APP V717I                                                      | 10         | -              | Cortex          | Increase        | [17]      |
| <i>Chemotactic factor</i>      |                                                                |            |                |                 |                 |           |
| MCP-1                          | PrP-hAβPP <sub>swe</sub> /PS1 <sup>ΔE9</sup>                   | 4.5        | Male or female | Brain           | Not significant | [27]      |
|                                |                                                                | 6.5        | Male or female | Brain           | Not significant | [27]      |
|                                |                                                                | 12.5       | Male or female | Brain           | Increase        | [27]      |
|                                |                                                                | 9          | -              | Hippocampus     | Not significant | [24]      |
|                                |                                                                | 14         | -              | Hippocampus     | Not significant | [24]      |
| MIP-1β                         | APP <sub>K670N/M671L</sub> /PS1 <sub>M146V</sub>               | 14.5       | -              | Plasma          | Increase        | [19]      |
| Eotaxin                        | APP <sub>K670N/M671L</sub> /PS1 <sub>M146V</sub>               | 14.5       | -              | Plasma          | Not significant | [19]      |
| RANTES                         | APP <sub>K670N/M671L</sub> /PS1 <sub>M146V</sub>               | 14.5       | -              | Plasma          | Not significant | [19]      |
| <i>Antiinflammatory factor</i> |                                                                |            |                |                 |                 |           |
| IL-4                           | PrP-hAβPP <sub>swe</sub> /PS1 <sup>ΔE9</sup>                   | 9          | Female         | Serum           | Not significant | [9]       |
|                                | APP <sub>K670N/M671L</sub> /PS1 <sub>M146V</sub>               | 14.5       | -              | Plasma          | Increase        | [19]      |
|                                | APP <sub>K670N/M671L</sub> /PS1 <sub>M146L</sub>               | 11         | -              | Plasma          | Increase        | [20]      |
| IL-5                           | APP <sub>K670N/M671L</sub> /PS1 <sub>M146V</sub>               | 14.5       | -              | Plasma          | Increase        | [19]      |
| IL-10                          | PrP-hAβPP <sub>swe</sub> /PS1 <sup>ΔE9</sup>                   | 9          | Female         | Serum           | Not significant | [9]       |
|                                |                                                                | 9.5        | Male           | Cortex          | Not significant | [14]      |
|                                | APP <sub>K670N/M671L</sub> /PS1 <sub>M146V</sub>               | 14.5       | -              | Plasma          | Increase        | [19]      |
| G-CSF                          | APP <sub>K670N/M671L</sub> /PS1 <sub>M146V</sub>               | 14.5       | -              | Plasma          | Not significant | [19]      |

- Horgan J, Miguel-Hidalgo JJ, Thrasher M and Bissette G. Longitudinal brain corticotropin releasing factor and somatostatin in a transgenic mouse (TG2576) model of Alzheimer's disease. Journal of Alzheimer's disease : JAD. 2007; 12(2):115-127.
- Sierksma AS, van den Hove DLA, Rutten K, Chouliaras L, Rostamian S, Steinbusch HWM and Prickaerts J. Chronic phosphodiesterase type 2 inhibition improves spatial memory and alters synaptic density in the hippocampus in the APP<sub>swe</sub>/PS1<sup>ΔE9</sup> mouse model of Alzheimer's disease. Society for Neuroscience Abstract Viewer and Itinerary Planner. 2011; 41.

3. Dong H, Yuede CM, Yoo HS, Martin MV, Deal C, Mace AG and Csernansky JG. Corticosterone and related receptor expression are associated with increased beta-amyloid plaques in isolated Tg2576 mice. *Neuroscience*. 2008; 155(1):154-163.
4. Carroll JC, Iba M, Bangasser DA, Valentino RJ, James MJ, Brunden KR, Lee VM and Trojanowski JQ. Chronic stress exacerbates tau pathology, neurodegeneration, and cognitive performance through a corticotropin-releasing factor receptor-dependent mechanism in a transgenic mouse model of tauopathy. *The Journal of neuroscience : the official journal of the Society for Neuroscience*. 2011; 31(40):14436-14449.
5. Hohsfield LA, Daschil N, Oradd G, Stromberg I and Humpel C. Vascular pathology of 20-month-old hypercholesterolemia mice in comparison to triple-transgenic and APPSwDI Alzheimer's disease mouse models. *Molecular and cellular neurosciences*. 2014; 63:83-95.
6. Gimenez-Llort L, Arranz L, Mate I and De la Fuente M. Gender-Specific Neuroimmunoendocrine Aging in a Triple-Transgenic 3xTg-AD Mouse Model for Alzheimer's Disease and Its Relation with Longevity. *Neuroimmunomodulation*. 2008; 15(4-6):331-343.
7. Green KN, Billings LM, Roozendaal B, McGaugh JL and LaFerla FM. Glucocorticoids increase amyloid-beta and tau pathology in a mouse model of Alzheimer's disease. *The Journal of neuroscience : the official journal of the Society for Neuroscience*. 2006; 26(35):9047-9056.
8. Hu ZP, Browne ER, Liu T, Angel TE, Ho PC and Chan EC. Metabonomic profiling of TASTPM transgenic Alzheimer's disease mouse model. *Journal of proteome research*. 2012; 11(12):5903-5913.
9. Danielyan L, Klein R, Hanson LR, Buadze M, Schwab M, Gleiter CH and Frey WH, II. Protective Effects of Intranasal Losartan in the APP/PS1 Transgenic Mouse Model of Alzheimer Disease. *Rejuvenation Research*. 2010; 13(2-3):195-201.
10. Xuan A-G, Pan X-B, Wei P, Ji W-D, Zhang W-J, Liu J-H, Hong L-P, Chen W-L and Long D-H. Valproic Acid Alleviates Memory Deficits and Attenuates Amyloid-beta Deposition in Transgenic Mouse Model of Alzheimer's Disease. *Molecular Neurobiology*. 2015; 51(1):300-312.
11. Lv C, Wang L, Liu X, Yan S, Yan SS, Wang Y and Zhang W. Multi-faced neuroprotective effects of geniposide depending on the RAGE-mediated signaling in an Alzheimer mouse model. *Neuropharmacology*. 2015; 89:175-184.
12. Song Y, Cui T, Xie N, Zhang X, Qian Z and Liu J. Protocatechuic acid improves cognitive deficits and attenuates amyloid deposits, inflammatory response in aged A beta PP/PS1 double transgenic mice. *International Immunopharmacology*. 2014; 20(1):276-281.
13. Yan J-J, Jung J-S, Kim T-K, Hasan MA, Hong C-W, Nam J-S and Song D-K. Protective Effects of Ferulic Acid in Amyloid Precursor Protein Plus Presenilin-1 Transgenic Mouse Model of Alzheimer Disease. *Biological & Pharmaceutical Bulletin*. 2013; 36(1):140-143.
14. Cherry JD, Liu B, Frost JL, Lemere CA, Williams JP, Olschowka JA and O'Banion MK. Galactic Cosmic Radiation Leads to Cognitive Impairment and Increased A beta Plaque Accumulation in a Mouse Model of Alzheimer's Disease. *Plos One*. 2012; 7(12).
15. Gallagher JJ, Minogue AM and Lynch MA. Impaired Performance of Female APP/PS1 Mice in the Morris Water Maze Is Coupled with Increased A beta Accumulation and Microglial Activation. *Neurodegenerative Diseases*. 2013; 11(1):33-41.
16. Cheng Y, Dong Z and Liu S. beta-Caryophyllene Ameliorates the Alzheimer-Like Phenotype in APP/PS1 Mice through CB2 Receptor Activation and the PPAR gamma Pathway. *Pharmacology*. 2014; 94(1-2):1-12.
17. Jiang H, Liu CX, Feng JB, Wang P, Zhao CP, Xie ZH, Wang Y, Xu SL, Zheng CY and Bi JZ. Granulocyte colony-stimulating factor attenuates chronic neuroinflammation in the brain of amyloid precursor protein transgenic mice: an Alzheimer's disease mouse model. *The Journal of international medical research*. 2010; 38(4):1305-1312.
18. Jimenez S, Baglietto-Vargas D, Caballero C, Moreno-Gonzalez I, Torres M, Sanchez-Varo R, Ruano D, Vizuete M, Gutierrez A and Vitorica J. Inflammatory Response in the Hippocampus of PS1(M146L)/APP(751SL) Mouse Model of Alzheimer's Disease: Age-Dependent Switch in the Microglial Phenotype from Alternative to Classic. *Journal Of Neuroscience*. 2008;

28(45):11650-11661.

19. Sanchez-Ramos J, Song S, Sava V, Catlow B, Lin X, Mori T, Cao C and Arendash GW. Granulocyte Colony Stimulating Factor Decreases Brain Amyloid Burden And Reverses Cognitive Impairment In Alzheimer's Mice. *Neuroscience*. 2009; 163(1):55-72.
20. Cao C, Arendash GW, Dickson A, Mamcarz MB, Lin X and Ethell DW. Abeta-specific Th2 cells provide cognitive and pathological benefits to Alzheimer's mice without infiltrating the CNS. *Neurobiol Dis*. 2009; 34(1):63-70.
21. Barrett JP, Minogue AM, Jones RS, Ribeiro C, Kelly RJ and Lynch MA. Bone Marrow-Derived Macrophages from A beta PP/PS1 Mice are Sensitized to the Effects of Inflammatory Stimuli. *Journal Of Alzheimers Disease*. 2015; 44(3):949-962.
22. Wang T, Jiang Y, Xiao L, 江毅 and 肖联平. Expression of amyloid beta-protein in bone tissue of APP/PS1 transgenic mouse. *National Medical Journal of China*. 2013; 93(1):65-68.
23. Yang M-W, Wang T-H, Yan P-P, Chu L-W, Yu J, Gao Z-D, Li Y-Z and Guo B-L. Curcumin improves bone microarchitecture and enhances mineral density in APP/PS1 transgenic mice. *Phytomedicine*. 2011; 18(2-3):205-213.
24. Schmole AC, Lundt R, Ternes S, Albayram O, Ulas T, Schultze JL, Bano D, Nicotera P, Alferink J and Zimmer A. Cannabinoid receptor 2 deficiency results in reduced neuroinflammation in an Alzheimer's disease mouse model. *Neurobiol Aging*. 2015; 36(2):710-719.
25. Serrano J, Fernandez AP, Martinez-Murillo R and Martinez A. High sensitivity to carcinogens in the brain of a mouse model of Alzheimer's disease. *Oncogene*. 2010; 29(15):2165-2171.
26. Giuliani D, Ottani A, Zaffe D, Galantucci M, Strinati F, Lodi R and Guarini S. Hydrogen sulfide slows down progression of experimental Alzheimer's disease by targeting multiple pathophysiological mechanisms. *Neurobiology Of Learning And Memory*. 2013; 104:82-91.
27. Jardanhazi-Kurutz D, Kummer MP, Terwel D, Vogel K, Thiele A and Heneka MT. Distinct Adrenergic System Changes And Neuroinflammation In Response To Induced Locus Ceruleus Degeneration In App/Ps1 Transgenic Mice. *Neuroscience*. 2011; 176:396-407.
